# Supplementary material for: Chiral recognition of macromolecules with cyclodextrins: pH- and thermosensitive copolymers from N-isopropylacrylamide and N-acryloyl-D/L-phenylalanine and their inclusion complexes with cyclodextrins
Source: publisher site journal article supplement (doi:10.3762/bjoc.7.27), 2011-02-14
Supplement: Additional file 1 [file 1860-5397-7-27-S1.pdf]

# Supporting information

for

## **Chiral recognition of macromolecules with cyclodextrins: pH- and thermosensitive copolymers from *N*-isopropylacrylamide and *N*-acryloyl-D/L-phenylalanine and their inclusion complexes with cyclodextrins**

Sabrina Gingter, Ella Bezdushna and Helmut Ritter\*

Address: Institute of Organic Chemistry and Macromolecular Chemistry, Heinrich-Heine-University Düsseldorf, Universitätsstraße 1, D-40225 Düsseldorf, Germany

E-mail: Helmut Ritter - [h.ritter@uni-duesseldorf.de](mailto:h.ritter@uni-duesseldorf.de)

\* Corresponding author

Additional 2D NMR ROESY and  $^1\text{H}$  NMR data

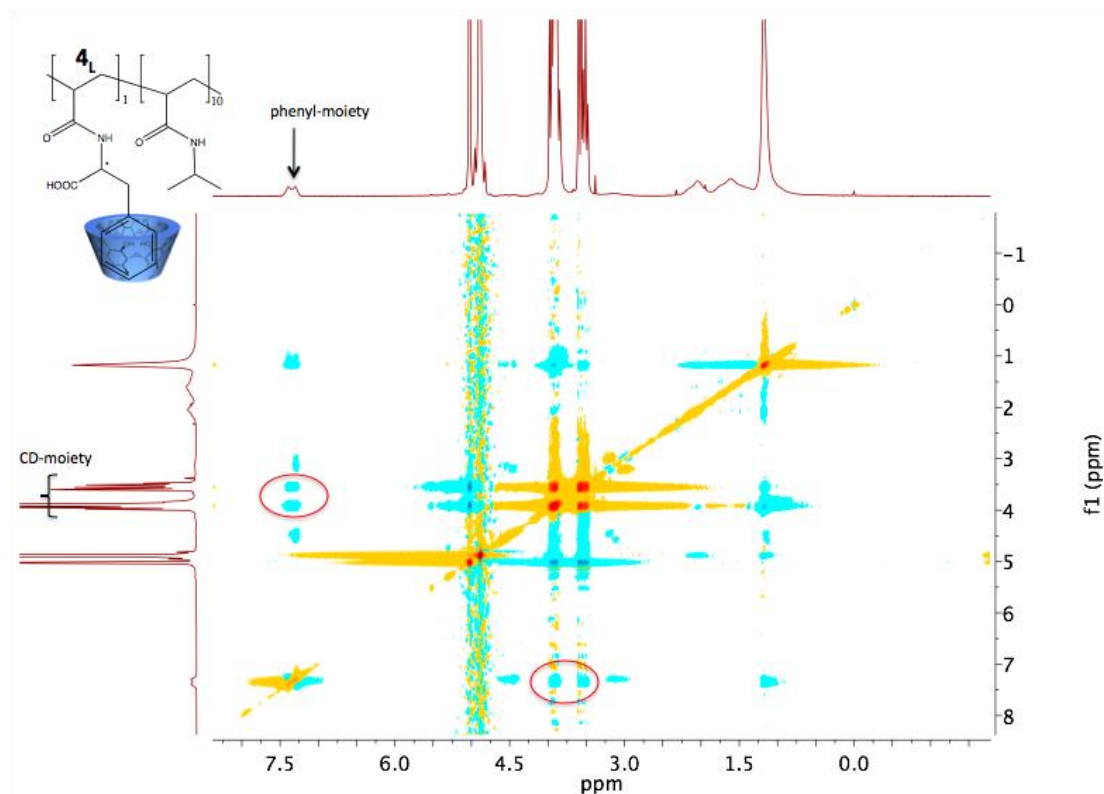

**Figure 1:** 2D NMR ROESY experiment showing the correlation between protons of the phenyl moiety of  $4_L$  with the  $\beta$ -CD protons.

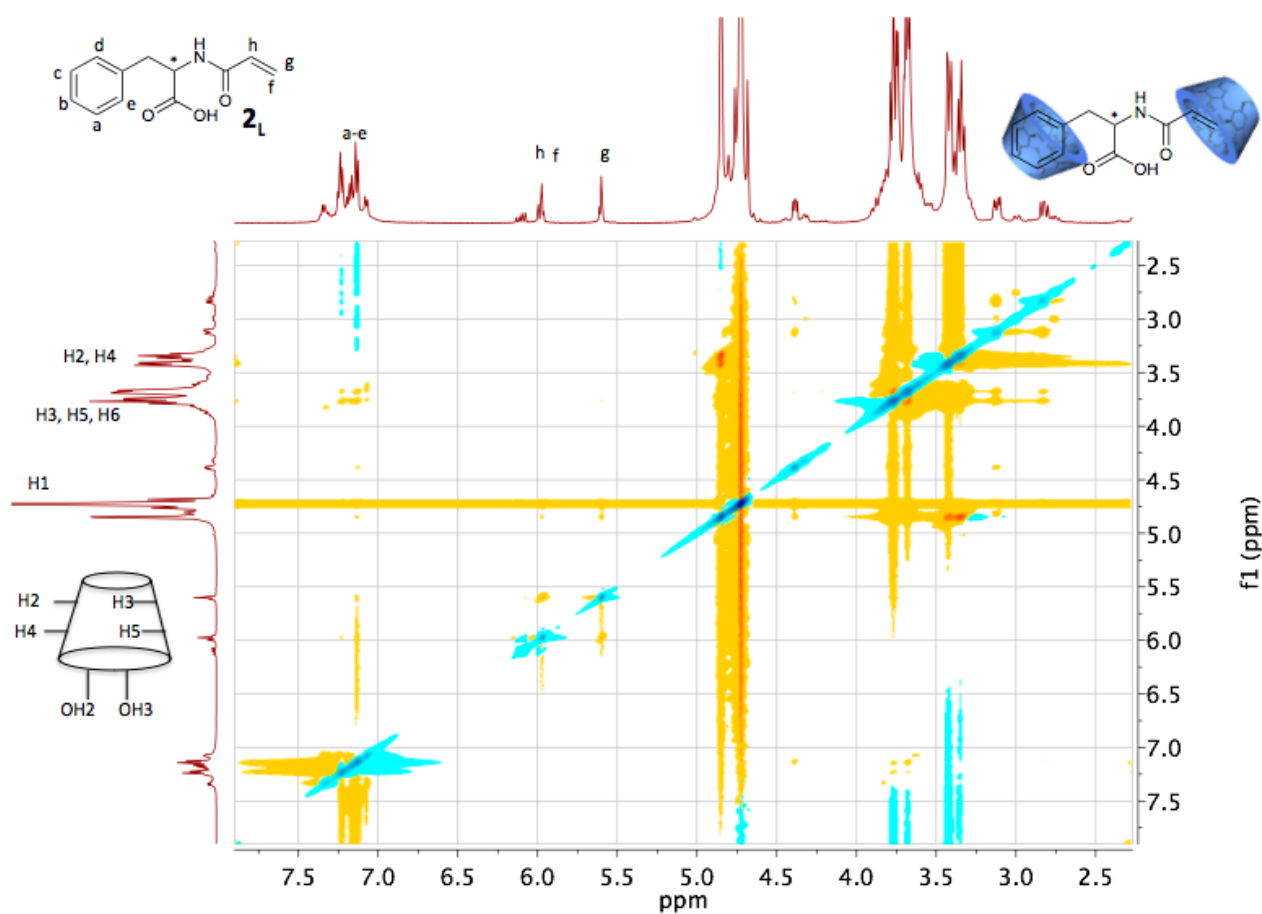

**Figure 2:** 2D NMR ROESY experiment showing the correlation between protons of the phenyl moiety of  $2_L$  with the  $\beta$ -CD protons.

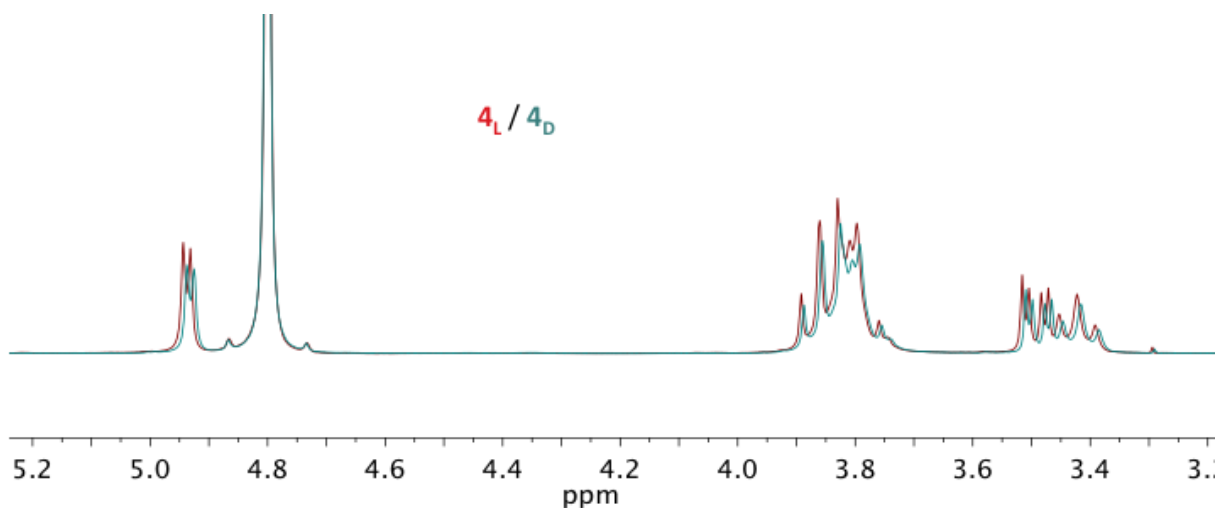

**Figure 3:** Section of  $^1\text{H}$  NMR spectra showing  $\beta$ -CD protons of supramolecular structures  $4_{\text{D}}$  and  $4_{\text{L}}$  in comparison exhibiting a small shift difference due to complexation with  $\beta$ -CD.

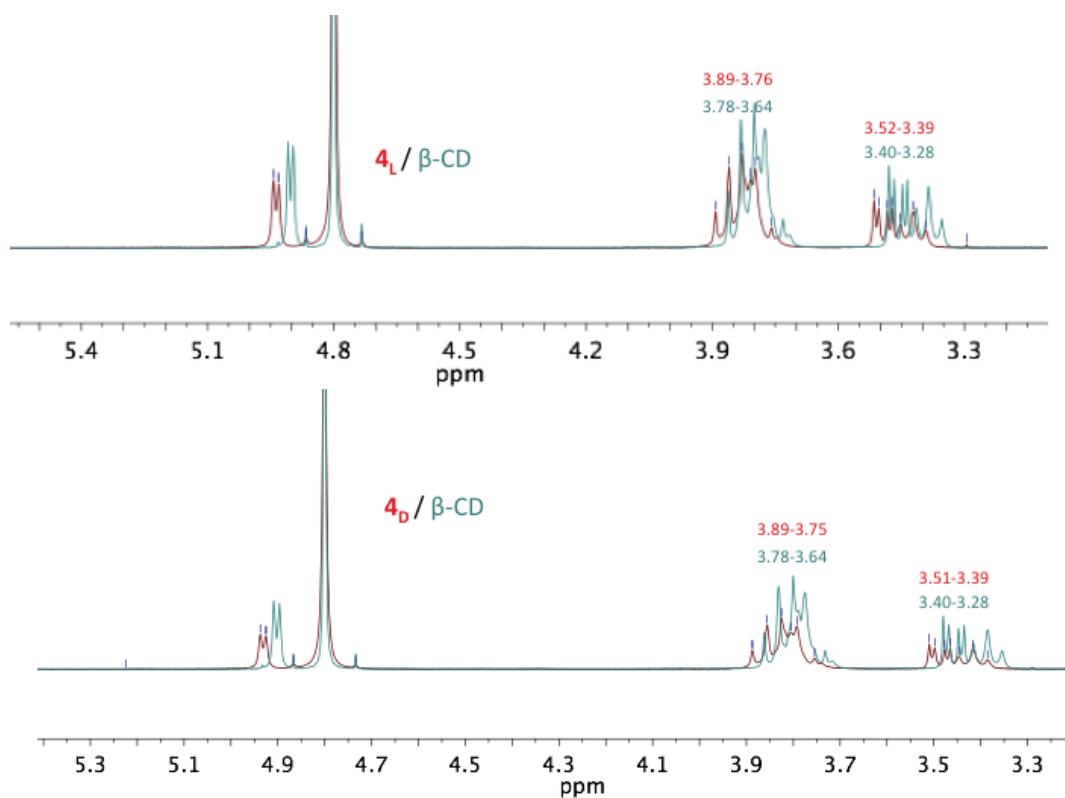

**Figure 4:** Section of  $^1\text{H}$  NMR spectra showing CD protons of supramolecular structures  $4_{\text{D}}$  and  $4_{\text{L}}$  in comparison with native  $\beta$ -CD exhibiting clear shift difference due to complexation with  $\beta$ -CD.
